# Supplementary material for: Halitosis and Pain Post Electrocautery Adenoidectomy
Source: MDPI journal article supplement (doi:10.3390/medicina55060312), 2019-06-25
Supplement: s1 [file s1]

Patient Name: \_\_\_\_\_

Patient DOB: \_\_\_\_\_

It would be appreciated if you could complete this survey/diary following your child's adenoidectomy.

I am interested to find out the incidence of halitosis (bad breath) and pain following the procedure.

Your help in completing this survey is very much appreciated. Thank you.

Please put a cross on the line scales below, based on your perception of the child's pain and breath odour

**Before surgery date:**

0 = No Pain

10 = Worst Pain Ever

0 = No Odour

10 = Extremely Foul Odour Ever

**1 Day after surgery date:**

0 = No Pain

10 = Worst Pain Ever

0 = No Odour

10 = Extremely Foul Odour Ever

**2 Days after surgery**

0 = No Pain

10 = Worst Pain Ever

0 = No Odour

10 = Extremely Foul Odour Ever

**3 Days after surgery**

0 = No Pain

10 = Worst Pain Ever

0 = No Odour

10 = Extremely Foul Odour Ever

**4 Days after surgery**

0 = No Pain

10 = Worst Pain Ever

0 = No Odour

10 = Extremely Foul Odour Ever

**5 Days after surgery**

0 = No Pain

10 = Worst Pain Ever

0 = No Odour

10 = Extremely Foul Odour Ever

**6 Days after surgery**

0 = No Pain

10 = Worst Pain Ever

0 = No Odour

10 = Extremely Foul Odour Ever

**7 Days after surgery**

0 = No Pain

10 = Worst Pain Ever

0 = No Odour

10 = Extremely Foul Odour Ever

Figure S1. Sample of the diary and VAS.
